# Supplementary material for: Manganese disturbs metal and protein homeostasis in Caenorhabditis elegans
Source: Royal Society of Chemistry journal article supplement (doi:10.1039/c4mt00168k), 2014-01-01
Supplement: c4mt00168k1.pdf [file c4mt00168k1.pdf]

| Temperature | Strain/Treatment             | Median Survival (days) | n (censored) | Log-rank p-value (compared to control) |
|-------------|------------------------------|------------------------|--------------|----------------------------------------|
|             | <b>Experiment #1 (+FUdR)</b> |                        |              |                                        |
| 20°C        | N2 control                   | 16                     | 42 (38)      |                                        |
|             | N2 10mM MnCl <sub>2</sub>    | 16                     | 81 (0)       | 0.0118                                 |
|             | N2 20mM MnCl <sub>2</sub>    | 9                      | 47 (33)      | <0.0001                                |
|             | N2 30mM MnCl <sub>2</sub>    | 2                      | 47 (33)      | <0.0001                                |
|             | <b>Experiment #2 (+FUdR)</b> |                        |              |                                        |
| 20°C        | N2 control                   | 14                     | 78 (2)       |                                        |
|             | N2 10mM MnCl <sub>2</sub>    | 16                     | 57 (23)      | 0.4035                                 |
|             | N2 20mM MnCl <sub>2</sub>    | 7                      | 62 (18)      | <0.0001                                |
|             | N2 30mM MnCl <sub>2</sub>    | 3                      | 66 (14)      | <0.0001                                |
|             | <b>Experiment #3 (+FUdR)</b> |                        |              |                                        |
| 20°C        | N2 control                   | 18                     | 69 (11)      |                                        |
|             | N2 10mM MnCl <sub>2</sub>    | 18                     | 77 (3)       | 0.9496                                 |
|             | N2 20mM MnCl <sub>2</sub>    | 7                      | 64 (16)      | <0.0001                                |
|             | N2 30mM MnCl <sub>2</sub>    | 3                      | 56 (24)      | <0.0001                                |
